# Supplementary material
Source: PubMed Central journal article supplement (PMC4136083)
Supplement: AEM.00551-14_zam999105583so1.pdf [file AEM.00551-14_zam999105583so1.pdf]

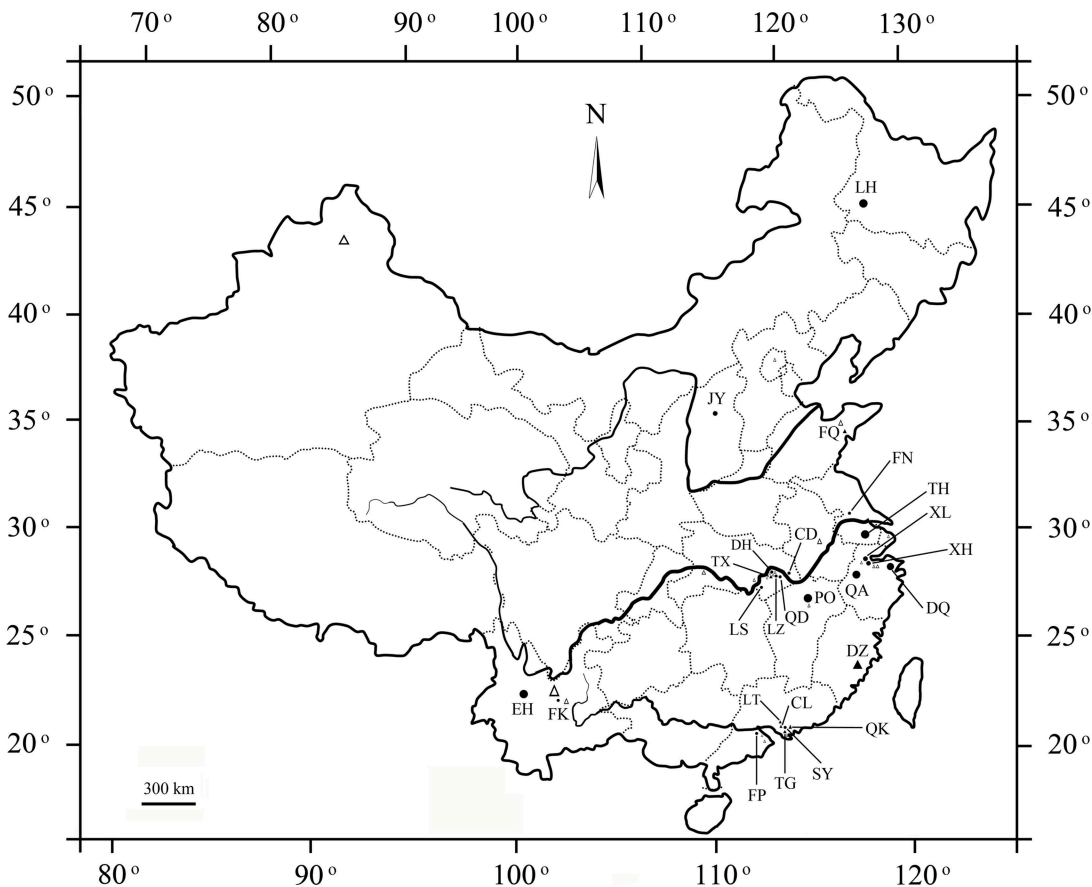

Figure S1 Location of freshwater bodies where cyanobacterial strains and water samples were obtained. Empty triangle, cyanobacterial strains were isolated; solid triangle, water samples were collected; solid circle, both cyanobacterial strains and water samples were obtained. Only geographic origin of water samples were labeled using abbreviations of freshwater bodies listed in Table 1.

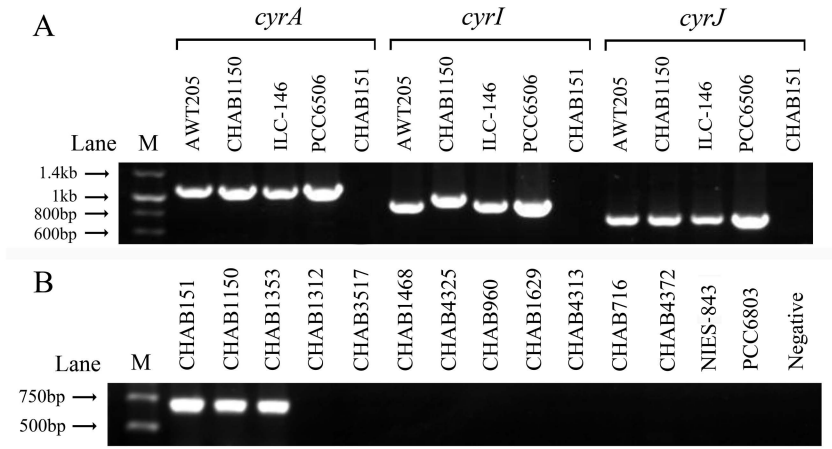

Figure S2 Specificity examination of *cyr* (A) and *rpoC1* (B) primers.

The strain numbers are as follows, *C. raciborskii* CHAB151 (non-CYNs-producing), *R. curvata* CHAB1150 (CYNs-producing), *R. mediterranea* CHAB1353, *Aph. issatschenkoi* CHAB1312, *Aph. flos-aquae* CHAB3517, *Aph. gracile* CHAB1468, *A. bergii* CHAB4325, *A. affinis* CHAB960, *A. flos-aquae* CHAB1629, *P. agardhii* CHAB4313, *Pseudanabaena mucicola* CHAB716, *M. wesenbergii* CHAB4372, *M. aeruginosa* NIES-843, *Synechocystis* sp. PCC6803, *C. raciborskii* AWT205 (CYNs-producing), *Aph. ovalisporum* ILC-164 (CYNs-producing), and *Oscillatoria* sp. PCC6506 (CYNs-producing).

|                                                                                                                                                               |     |                                                                                   |
|---------------------------------------------------------------------------------------------------------------------------------------------------------------|-----|-----------------------------------------------------------------------------------|
| <i>C. raciborskii</i> AWT205 <i>cyrI</i>                                                                                                                      | 241 | TATGAATGCGAAAGTGAGCTTGAATTAGCAAAGTATCAAGAAGACGCACCCACATTGATTAAGAAATGCGGAGGCTGGT   |
|                                                                                                                                                               |     | Y E C E S E L E L A K Y Q E D A P T L I K E M R R L V                             |
| TG <i>cyrI</i> 5<br>(SY <i>cyrI</i> 5)                                                                                                                        | 241 | TATGAATGCGAAAGTGAGCTTGAATTAGCAAAGTATCAAGAAGACGCACCCACATTGATTAAGAAATGCGGAGGCTGGT   |
|                                                                                                                                                               |     | Y E C E S E L E L A K Y Q E D A P T L I K * M R R L V                             |
| <i>C. raciborskii</i> CHAB358 <i>cyrI</i><br>(TG <i>cyrI</i> 2, TG <i>cyrI</i> 7, TG <i>cyrI</i> 8,<br>TG <i>cyrI</i> 10, SY <i>cyrI</i> 4, SY <i>cyrI</i> 6) | 241 | TATGAATGCGAAAGTGAGCTTGAATTAGCAAAGTATCAAGAAGACGCACCCACATTGATTAAGAAATGCGGAGGCTGGT   |
|                                                                                                                                                               |     | Y E C E S E L E L A K Y Q E D A P T L I K E M R R L V                             |
| <i>C. raciborskii</i> AWT205 <i>cyrI</i>                                                                                                                      | 496 | GAATATTATAAAGATAAACCAAAATATCATAAATCAAATCGCAGCAAATGTATATTTAAAAACGTCTGCATCAGGAGGAGA |
|                                                                                                                                                               |     | E Y Y K D K P N I I N Q I A A N V Y L K T S A S G G E                             |
| TG <i>cyrI</i> 5<br>(SY <i>cyrI</i> 5)                                                                                                                        | 496 | GAATATTATAAAGATAAACCAAAATATCATAAATCAAATCGCAGCAAATGTATATTTAAAAACGTCTGCATCAGGAGGAGA |
|                                                                                                                                                               |     | E Y Y K D K P N I I N Q I A A N V Y L K T S A S G G E                             |
| <i>C. raciborskii</i> CHAB358 <i>cyrI</i><br>(TG <i>cyrI</i> 2, TG <i>cyrI</i> 7, TG <i>cyrI</i> 8,<br>TG <i>cyrI</i> 10, SY <i>cyrI</i> 4, SY <i>cyrI</i> 6) | 496 | GAATATTATAAAGATAAACCAAAATATCATAAATCAAATCGCAGCAAATGTATATTTAAAAACGTCTGCATCAGGAGGAGA |
|                                                                                                                                                               |     | E Y Y K D K P N I I N * I A A N V Y L K T S A S G G E                             |

Figure S3 Partial alignment of mutant *cyrI* gene sequences and deduced protein sequences. Rectangle, nucleotide mutation; asterisk, stop codon.

|                                          |                   |     |                                                                                                                                                                                                                     |
|------------------------------------------|-------------------|-----|---------------------------------------------------------------------------------------------------------------------------------------------------------------------------------------------------------------------|
| Itype1                                   | TG <i>cyr1</i> 1  | 1   | ATGACCATATATGAAAATAAGTTGAGTAGTTATCAAAAAAATCAAGATGCCATAATATCTGCAAAAAGAACTCGAAGAATG<br>M T I Y E N K L S S Y Q K N Q D A I I S A K E L E E W                                                                          |
| Itype2                                   | LZ <i>cyr1</i> 1  | 1   | ATGACCATATATGAAAATAAGTTGAGTAGTTATCAAAAAAATCAAGATGCCATAATATCTGCAAAAAGAACTCGAAGAATG<br>M T I Y E N K L S S Y Q K N Q D A I I S A K E L E E W                                                                          |
| Itype3                                   | DZ <i>cyr1</i> 1  | 1   | ATGACCATATATGAAAATAAGTTGAGTAGTTATCAAAAAAATCAAGATGCCATAATATCTGCAAAAAGAACTCGAAGAATG<br>M T I Y E N K L S S Y Q K N Q D A I I S A K E L E E W                                                                          |
| Itype4a <sup>f</sup>                     | CD <i>cyr1</i> 1  | 1   | ATGACCATATATGAAAATAAGTTGAGTAGTTATCAAAAAAATCAAGATGCCATAATATCTGCAAAAAGAACTCGAAGAATG<br>M T I Y E N K L S S Y Q K N Q D A I I S A K E L E E W                                                                          |
| Itype4a <sup>f</sup>                     | CD <i>cyr1</i> 10 | 1   | ATGACCATATATGAAAATAAGTTGAGTAGTTATCAAAAAAATCAAGATGCCATAATATCTGCAAAAAGAACTCGAAGAATG<br>M T I Y E N K L S S Y Q K N Q D A I I S A K E L E E W                                                                          |
| <i>C. raciborskii</i> AWT205 <i>cyr1</i> |                   | 1   | ATGACCATATATGAAAATAAGTTGAGTAGTTATCAAAAAAATCAAGATGCCATAATATCTGCAAAAAGAACTCGAAGAATG<br>M T I Y E N K L S S Y Q K N Q D A I I S A K E L E E W                                                                          |
| Itype1                                   | TG <i>cyr1</i> 1  | 81  | GCATT-----<br>H L                                                                                                                                                                                                   |
| Itype2                                   | LZ <i>cyr1</i> 1  | 81  | GCATT-----<br>H L                                                                                                                                                                                                   |
| Itype3                                   | DZ <i>cyr1</i> 1  | 81  | GCATT-----<br>H L                                                                                                                                                                                                   |
| Itype4a <sup>f</sup>                     | CD <i>cyr1</i> 1  | 81  | GCATT <b><u>TACAGCAGTTTT</u></b> <b><u>CTACTATTTAA</u></b> <b><u>ACCAGATTTGATTACCTTCTCCCTTTGTCG</u></b> <b><u>GAAACAAAAACCGTGGTT</u></b> <b><u>CAT</u></b><br>H L Q Q F S S I * T R F * L P S P F V R N K N R G S F |
| Itype4a <sup>f</sup>                     | CD <i>cyr1</i> 10 | 81  | GCATT <b><u>TACAGCGAATTT</u></b> <b><u>CAGGTAATGA</u></b> <b><u>ACCACGTTTTTTGTTTCGCGCAAAGGGAAGGTAATCAA</u></b> <b><u>AATCTGGTTTAA</u></b><br>H L Q R I S G K * T T V F V S R K G R R * S K S G L N                  |
| <i>C. raciborskii</i> AWT205 <i>cyr1</i> |                   | 81  | GCATT-----<br>H L                                                                                                                                                                                                   |
| Itype1                                   | TG <i>cyr1</i> 1  | 86  | -----TAATGGACTTCTAGACCATTCAATAGATGCGGTAATAGTACCGAATTATTTCTTGAGCAAG<br>I G L L D H S I D A V I V P N Y F L E Q E                                                                                                     |
| Itype2                                   | LZ <i>cyr1</i> 1  | 86  | -----TAATGGACTTCTAGACCATTCAATAGATGCGGTAATAGTACCGAATTATTTCTTGAGCAAG<br>I G L L D H S I D A V I V P N Y F L E Q E                                                                                                     |
| Itype3                                   | DZ <i>cyr1</i> 1  | 86  | -----TAATGGACTTCTAGACCATTCAATAGATGCGGTAATAGTACCGAATTATTTCTTGAGCAAG<br>I G L L D H S I D A V I V P N Y F L E Q E                                                                                                     |
| Itype4a <sup>f</sup>                     | CD <i>cyr1</i> 1  | 161 | <b><u>TTACCTGAAATTCGCTGTAATTTGGACTTCTAGACCATTCAATAGATGCGGTAATAGTACCGAATTATTTCTTGAGCAAG</u></b><br><b><u>T * N S L * L D F * T I Q * M R * * Y R I I F L S K</u></b>                                                 |
| Itype4a <sup>f</sup>                     | CD <i>cyr1</i> 10 | 161 | <b><u>ATAGATGAAACTCGCTGTAATTTGGACTTCTAGACCATTCAATAGATGCGGTAATAGTACCGAATTATTTCTTGAGCAAG</u></b><br><b><u>R * K L L * L D F * T I Q * M R * * Y R I I F L S K</u></b>                                                 |
| <i>C. raciborskii</i> AWT205 <i>cyr1</i> |                   | 86  | -----TAATGGACTTCTAGACCATTCAATAGATGCGGTAATAGTACCGAATTATTTCTTGAGCAAG<br>I G L L D H S I D A V I V P N Y F L E Q E                                                                                                     |
| Itype1                                   | TG <i>cyr1</i> 1  | 389 | ATTTAGCAAACTTGGTGATAAAAAAAGTGGTTCGCGGTATAGTTAGAGAGTTTAAAGAAGATAACCCCTGGCGCACCACAT<br>L A K L G D K K L F A G I V R E F K E D N P G A P H                                                                            |
| Itype2                                   | LZ <i>cyr1</i> 1  | 389 | ATTTAGCAAACTTGGTGATAAAAAAAGTGGTTCGCGGTATAGTTAGAGAGTTTAAAGAAGATAACCCCTGGCGCACCACAT<br>L A K L G D K K L F A G I V R E F K E D N P G A P H                                                                            |
| Itype3                                   | DZ <i>cyr1</i> 1  | 389 | ATTTAGCAAACTTGGTGATAAAAAAAGTGGTTCGCGGTATAGTTAGAGAGTTTAAAGAAGATAACCCCTGGCGCACCACAT<br>L A K L G D K K L F A G I V R E F K E D N P G A P H                                                                            |
| Itype4a <sup>f</sup>                     | CD <i>cyr1</i> 1  | 481 | ATTTAGCAAACTTGGTGATAAAAAAAGTGGTTCGCGGTATAGTTAGAGAGTTTAAAGAAGATAACCCCTGGCGCACCACAT<br>I * Q N L V I K N C L R V * L E S L K K I T L A H H I                                                                          |
| Itype4a <sup>f</sup>                     | CD <i>cyr1</i> 10 | 481 | ATTTAGCAAACTTGGTGATAAAAAAAGTGGTTCGCGGTATAGTTAGAGAGTTTAAAGAAGATAACCCCTGGCGCACCACAT<br>I * Q N L V I K N C L R V * L E S L K K I T L A H H I                                                                          |
| <i>C. raciborskii</i> AWT205 <i>cyr1</i> |                   | 389 | ATTTAGCAAACTTGGTGATAAAAAAAGTGGTTCGCGGTATAGTTAGAGAGTTTAAAGAAGATAACCCCTGGCGCACCACAT<br>L A K L G D K K L F A G I V R E F K E D N P G A P H                                                                            |
| Itype1                                   | TG <i>cyr1</i> 1  | 469 | <b><u>TGTGACGTAATGGCATGGGGTTTTCT</u></b> -----CGAATATTATAAGATAAAACAAA<br>C D V M A W G F L E Y C K D K P N                                                                                                          |
| Itype2                                   | LZ <i>cyr1</i> 1  | 469 | <b><u>TGTGACGTAATGGCATGGGGTTTTCT</u></b> -----CGAATATTATAAGATAAAACAAA<br>C D V M A W G F L E Y C K D K P N                                                                                                          |
| Itype3                                   | DZ <i>cyr1</i> 1  | 469 | <b><u>TGTGACGTAATGGCATGGGGTTTTCTACATTGTGACGTAATGGCATGGGGTTTTCT</u></b> CGAATATTATAAGATAAAACAAA<br>C D V M A W G F L H C D V M A W G F L E Y Y K D K P N                                                             |
| Itype4a <sup>f</sup>                     | CD <i>cyr1</i> 1  | 561 | <b><u>TGTGACGTAATGGCATGGGGTTTTCT</u></b> -----CGAATATTATAAGATAAAACAAA<br>V T * W H G V F S N I I K I N Q I                                                                                                          |
| Itype4a <sup>f</sup>                     | CD <i>cyr1</i> 10 | 561 | <b><u>TGTGACGTAATGGCATGGGGTTTTCT</u></b> -----CGAATATTATAAGATAAAACAAA<br>V T * W H G V F S N I I K I N Q I                                                                                                          |
| <i>C. raciborskii</i> AWT205 <i>cyr1</i> |                   | 469 | <b><u>TGTGACGTAATGGCATGGGGTTTTCT</u></b> -----CGAATATTATAAGATAAAACAAA<br>C D V M A W G F L E Y Y K D K P N                                                                                                          |
| Itype1                                   | TG <i>cyr1</i> 1  | 599 | CAACTCAAAGCGAATATATAGCAT-----ACAAAACAGATGATCCAGCTAGTTTCGGTCTTGATAGCAAAAAGATCGCA<br>T Q S E Y I A Y K T D D P A S F G L D S K K I A                                                                                  |
| Itype2                                   | LZ <i>cyr1</i> 1  | 599 | CAACTCAAAGCGAATATATAGCATTAGCATACAAAACAGATGATCCAGCTAGTTTCGGTCTTGATAGCAAAAAGATCGCA<br>T Q S E Y I A L A Y K T D D P A S F G L D S K K I A                                                                             |
| Itype3                                   | DZ <i>cyr1</i> 1  | 629 | CAACTCAAAGCGAATATATAGCAT <b><u>TAGCATACAAAACAGATGATCCAGCTAGTTTCGGTCTTGATAGCAAAAAGATCGCA</u></b><br>T Q S E Y I A L A Y K T D D P A S F G L D S K K I A                                                              |
| Itype4a <sup>f</sup>                     | CD <i>cyr1</i> 1  | 691 | CAACTCAAAGCGAATATATAGCAT-----ACAAAACAGATGATCCAGCTAGTTTCGGTCTTGATAGCAAAAAGATCGCA<br>Q L K A N I * H T K Q M I Q L V S V L I A K R S H                                                                                |
| Itype4a <sup>f</sup>                     | CD <i>cyr1</i> 10 | 691 | CAACTCAAAGCGAATATATAGCAT-----ACAAAACAGATGATCCAGCTAGTTTCGGTCTTGATAGCAAAAAGATCGCA<br>Q L K A N I * H T K Q M I Q L V S V L I A K R S H                                                                                |
| <i>C. raciborskii</i> AWT205 <i>cyr1</i> |                   | 599 | CAACTCAAAGCGAATATATAGCAT-----ACAAAACAGATGATCCAGCTAGTTTCGGTCTTGATAGCAAAAAGATCGCA<br>T Q S E Y I A Y K T D D P A S F G L D S K K I A                                                                                  |

Figure S4 Partial alignment of representative *cyr1* gene sequences and deduced protein sequences. Repeat sequences and insertion sequences were italicized. Dash line, gaps introduced into the alignment; bold line, ITRs; arrow, beginning of repeat sequences; asterisk, stop codon.



|                                 |                     |                                                  |
|---------------------------------|---------------------|--------------------------------------------------|
| <i>C. raciborskii</i> AWT205    | <i>cyrJ</i> repeat1 | TTGGCGATCCGTCATCGATCTGTTAAAGGCTCCCCTGCCTGAAGGGAA |
| <i>C. raciborskii</i> AWT205    | <i>cyrJ</i> repeat2 | -----AA.....                                     |
| <i>C. raciborskii</i> CS-505    | <i>cyrJ</i> repeat1 | .....                                            |
| <i>C. raciborskii</i> CS-505    | <i>cyrJ</i> repeat2 | -----AA.....                                     |
| <i>C. raciborskii</i> cyDB-1    | <i>cyrJ</i> repeat1 | .....                                            |
| <i>C. raciborskii</i> cyDB-1    | <i>cyrJ</i> repeat2 | -----AA.....                                     |
| <i>C. raciborskii</i> CHAB358   | <i>cyrJ</i> repeat1 | .....                                            |
| <i>C. raciborskii</i> CHAB358   | <i>cyrJ</i> repeat2 | ..T.....                                         |
| <i>C. raciborskii</i> CHAB3438  | <i>cyrJ</i> repeat1 | .....                                            |
| <i>C. raciborskii</i> CHAB3438  | <i>cyrJ</i> repeat2 | ..T.....                                         |
| <i>R. curvata</i> CHAB1150      | <i>cyrJ</i> repeat1 | .....                                            |
| <i>R. curvata</i> CHAB1150      | <i>cyrJ</i> repeat2 | ..T.....                                         |
| <i>R. curvata</i> CHAB3416      | <i>cyrJ</i> repeat1 | .....                                            |
| <i>R. curvata</i> CHAB3416      | <i>cyrJ</i> repeat2 | ..T.....                                         |
| <i>R. curvata</i> HB1           | <i>cyrJ</i> repeat1 | .....                                            |
| <i>R. curvata</i> HB1           | <i>cyrJ</i> repeat2 | ..T.....                                         |
| <i>R. mediterranea</i> FSS-150  | <i>cyrJ</i> repeat1 | .....                                            |
| <i>R. mediterranea</i> FSS-150  | <i>cyrJ</i> repeat2 | -----AA.....                                     |
| <i>Aphanizomenon</i> sp. 10E6   | <i>cyrJ</i> repeat1 | .....                                            |
| <i>Aphanizomenon</i> sp. 10E6   | <i>cyrJ</i> repeat2 | ..T.....                                         |
| <i>Aph. ovalisporum</i> ILC-164 | <i>cyrJ</i> repeat1 | .....A...G...G.....A...TGC...T.A...              |
| <i>Aph. ovalisporum</i> ILC-164 | <i>cyrJ</i> repeat2 | .....A.....A.....                                |
| <i>A. lapponica</i> 966         | <i>cyrJ</i> repeat1 | .....A...G...G.....T...C.T.C.T.A...              |
| <i>A. lapponica</i> 966         | <i>cyrJ</i> repeat2 | .....A...G...GA.....A...T...C...A...             |
| <i>Oscillatoria</i> sp. PCC6506 | <i>cyrJ</i> repeat1 | .....A.A...T.T.G.G.....G.A.C...A...              |
| <i>Oscillatoria</i> sp. PCC6506 | <i>cyrJ</i> repeat2 | ..T.A.A.A...G.....C.....                         |
| <i>L. wollei</i> Yabba Creek    | <i>cyrJ</i> repeat1 | .....A...T...A.....C...AA...                     |
| <i>L. wollei</i> Yabba Creek    | <i>cyrJ</i> repeat2 | ..T.C.AT.....A.....C.....                        |

Figure S5 Alignment of repeated 48-nucleotide fragments within *cyrJ* gene sequences from CYNs-producing strains. Dash line, gaps introduced into the alignment; dots, nucleotides identical to repeat1 of *C. raciborskii* AWT205.

|  |                                          |     |                                                                       |          |          |          |          |
|--|------------------------------------------|-----|-----------------------------------------------------------------------|----------|----------|----------|----------|
|  |                                          |     |                                                                       | <u>β</u> | <u>α</u> | <u>β</u> | <u>α</u> |
|  | Itype1 TG <i>cyrI</i> 1                  | 1   | MTIYENKLSYQKNQDAIISAKELEEWHLIGLLDHSIDAVIVPNYFLEQE                     |          |          |          |          |
|  | Itype2 LZ <i>cyrI</i> 1                  | 1   | MTIYENKLSYQKNQDAIISAKELEEWHLIGLLDHSIDAVIVPNYFLEQE                     |          |          |          |          |
|  | Itype3 DZ <i>cyrI</i> 1                  | 1   | MTIYENKLSYQKNQDAIISAKELEEWHLIGLLDHSIDAVIVPNYFLEQE                     |          |          |          |          |
|  | <i>C. raciborskii</i> AWT205 <i>cyrI</i> | 1   | MTIYENKLSYQKNQDAIISAKELEEWHLIGLLDHSIDAVIVPNYFLEQE                     |          |          |          |          |
|  |                                          |     |                                                                       | <u>α</u> | <u>β</u> | <u>β</u> | <u>α</u> |
|  | Itype1 TG <i>cyrI</i> 1                  | 51  | CMTISERIKKSKYFSAYPGHPSVSRGQELYECESELELAKYQEDAPTLI                     |          |          |          |          |
|  | Itype2 LZ <i>cyrI</i> 1                  | 51  | CMTISERIKKSKYFSAYPGHPSVSRGQELYECESELELAKYQEDAPTLI                     |          |          |          |          |
|  | Itype3 DZ <i>cyrI</i> 1                  | 51  | CMTISERIKKSKYFSAYPGHPSVSRGQELYECESELELAKYQEDAPTLI                     |          |          |          |          |
|  | <i>C. raciborskii</i> AWT205 <i>cyrI</i> | 51  | CMTISERIKKSKYFSAYPGHPSVSSLGQELYECESELELAKYQEDAPTLI                    |          |          |          |          |
|  |                                          |     |                                                                       | <u>α</u> | <u>α</u> | <u>β</u> | <u>β</u> |
|  | Itype1 TG <i>cyrI</i> 1                  | 101 | KEMRRLVHPYISPIDRLRVEVDDIWSYGCNLAKLGDKKLFAGIVREFKD                     |          |          |          |          |
|  | Itype2 LZ <i>cyrI</i> 1                  | 101 | KEMRRLVHPYISPIDRLRVEVDDIWSYGCNLAKLGDKKLFAGIVREFKD                     |          |          |          |          |
|  | Itype3 DZ <i>cyrI</i> 1                  | 101 | KEMRRLVHPYISPIDRLRVEVDDIWSYGCNLAKLGDKKLFAGIVREFKD                     |          |          |          |          |
|  | <i>C. raciborskii</i> AWT205 <i>cyrI</i> | 101 | KEMRRLVHPYISPIDRLRVEVDDIWSYGCNLAKLGDKKLFAGIVREFKD                     |          |          |          |          |
|  |                                          |     |                                                                       |          |          | <u>β</u> |          |
|  | Itype1 TG <i>cyrI</i> 1                  | 151 | NPGAPHCDVMAWGFL-----EYCKDKPNIINQIAANVYLKTSASG                         |          |          |          |          |
|  | Itype2 LZ <i>cyrI</i> 1                  | 151 | NPGAPHCDVMAWGFL-----EYYKDKPNIINQIAANVYLKTSASG                         |          |          |          |          |
|  | Itype3 DZ <i>cyrI</i> 1                  | 151 | NPGAPHCDVMAWGFL <b>CD</b> VMAWGFL <b>CD</b> EYYKDKPNIINQIAANVYLKTSASG |          |          |          |          |
|  | <i>C. raciborskii</i> AWT205 <i>cyrI</i> | 151 | NPGAPHCDVMAWGFL-----EYYKDKPNIINQIAANVYLKTSASG                         |          |          |          |          |
|  |                                          |     |                                                                       | <u>β</u> | <u>α</u> | <u>β</u> | <u>β</u> |
|  | Itype1 TG <i>cyrI</i> 1                  | 191 | GEIVLWDEWPTQSEYIA--YKTDDPASFGLDSKKIAQPKLEIQPNQGDLI                    |          |          |          |          |
|  | Itype2 LZ <i>cyrI</i> 1                  | 191 | GEIVLWDEWPTQSEYIALAYKTDDPASFGLDSKKIAQPKLEIQPNQGDLI                    |          |          |          |          |
|  | Itype3 DZ <i>cyrI</i> 1                  | 201 | GEIVLWDEWPTQSEYIALAYKTDDPASFGLDSKKIAQPKLEIQPNQGDLI                    |          |          |          |          |
|  | <i>C. raciborskii</i> AWT205 <i>cyrI</i> | 191 | GEIVLWDEWPTQSEYIA--YKTDDPASFGLDSKKIAQPKLEIQPNQGDLI                    |          |          |          |          |
|  |                                          |     |                                                                       | <u>β</u> | <u>β</u> |          |          |
|  | Itype1 TG <i>cyrI</i> 1                  | 239 | LFNSMRI <b>IA</b> VAVKKIETGVRMTWGCL                                   |          |          |          |          |
|  | Itype2 LZ <i>cyrI</i> 1                  | 241 | LFNSMRI <b>IA</b> VAVKKIETGVRMTWGCL                                   |          |          |          |          |
|  | Itype3 DZ <i>cyrI</i> 1                  | 251 | LFNSMRI <b>IA</b> VAVKKIETGVRMTWGCL                                   |          |          |          |          |
|  | <i>C. raciborskii</i> AWT205 <i>cyrI</i> | 239 | LFNSMRI <b>IA</b> VAVKKIETGVRMTWGCL                                   |          |          |          |          |

Figure S6 Predicted secondary structures of *CyrI* proteins. Bold line,  $\alpha$ -helix and  $\beta$ -sheet; dash line, gaps introduced into the alignment; rectangle, amino acids involved in  $\text{Fe}^{2+}$  binding.

|                       |                    |     |                                                       |
|-----------------------|--------------------|-----|-------------------------------------------------------|
|                       |                    |     | <u>α</u> <u>β</u> <u>α</u>                            |
| Jtype1                | TG <i>cyrJ</i> 2   | 1   | RSLGTVLLQAWSSRPDTVVVFDELLSFYPYLFIKGKDMGFTWTDLDSSQMPH  |
| Jtype2a               | TG <i>cyrJ</i> 1   | 1   | RSLGTVLLQAWSSRPDTVVVFDELLSFYPYLFIKGKDMGFTWTDLDSSQMPH  |
| Jtype2b               | SY <i>cyrJ</i> 1   | 1   | RSLGTVLLQAWSSRPDTVVVFDELLSFYPYLFIKGKDMGFTWTDLDSSQMPH  |
| Jtype3                | TG <i>cyrJ</i> 7   | 1   | RSLGTVLLQAWSSRPDTVVVFDELLSFYPYLFIKGKDMGFTWTDLDSSQMPH  |
| <i>C. raciborskii</i> | AWT205 <i>cyrJ</i> | 1   | RSLGTVLLQAWSSRPDTVVVFDELLSFYPYLFIKGKDMGFTWTDLDSSQMPH  |
|                       |                    |     | <u>α</u> <u>α</u> <u>α</u>                            |
| Jtype1                | TG <i>cyrJ</i> 2   | 51  | ADWRSVIDLLKAPLPEG-----K                               |
| Jtype2a               | TG <i>cyrJ</i> 1   | 51  | ADWRSVIDLLKAPLPEGNLRSVIDLLKAPLPEG-----K               |
| Jtype2b               | SY <i>cyrJ</i> 1   | 51  | ADWRSVIDLLKAPLPDW--RSVIDLLKAPLPEG-----K               |
| Jtype3                | TG <i>cyrJ</i> 7   | 51  | ADWRSVIDLLKAPLPEGNLRSVIDLLKAPLPEGNLRSVIDLLKAPLPEGK    |
| <i>C. raciborskii</i> | AWT205 <i>cyrJ</i> | 51  | ADWRSVIDLLKAPLPEG--KSIIDLLKAPLPEG-----K               |
|                       |                    |     | <u>β</u> <u>α</u> <u>β</u> <u>α</u> <u>α</u>          |
| Jtype1                | TG <i>cyrJ</i> 2   | 69  | SICYQKHQAYHLIEETMGIEWISPFNSCNCFILIRQPKEMLLSFRKIVPHFTF |
| Jtype2a               | TG <i>cyrJ</i> 1   | 85  | SICYQKHQAYHLIEETMGIEWILPFSNCFILIRQPKEMLLSFRKIVPHFTF   |
| Jtype2b               | SY <i>cyrJ</i> 1   | 83  | SICYQKHQAYHLIEETMGIEWILPFSNCFILIRQPKEMLLSFRKIVPHFTF   |
| Jtype3                | TG <i>cyrJ</i> 7   | 101 | SICYQKHQAYHLIEETMGIEWILPFSNCFILIRQPKEMLLSFRKIVPHFTF   |
| <i>C. raciborskii</i> | AWT205 <i>cyrJ</i> | 83  | SICYQKHQAYHLIEETMGIEWILPFSNCFILIRQPKEMLLSFRKIVPHFTF   |
|                       |                    |     | <u>α</u> <u>β</u> <u>α</u> <u>α</u>                   |
| Jtype1                | TG <i>cyrJ</i> 2   | 119 | EETGWIELKRLFDYVHQTSGVIPPVIDAHDLLNDPRRMLSKLCQVVGVEF    |
| Jtype2a               | TG <i>cyrJ</i> 1   | 135 | EETGWIELKRLFDYVHQTSGVIPPVIDAHDLLNDPQRMLSKLCQVVGVEF    |
| Jtype2b               | SY <i>cyrJ</i> 1   | 133 | EETGWIELKRLFDYVHQTSGVIPPVIDAHDLLNGPRRMLSKLCQVVGVEF    |
| Jtype3                | TG <i>cyrJ</i> 7   | 151 | EETGWIELKRLFDYVHQTSGVIPPVIDARDLLNDPWRMLSKLCQVVGVEF    |
| <i>C. raciborskii</i> | AWT205 <i>cyrJ</i> | 133 | EETGWIELKRLFDYVHQTSGVIPPVIDAHDLLNDPRRMLSKLCQVVGVEF    |
|                       |                    |     | <u>α</u>                                              |
| Jtype1                | TG <i>cyrJ</i> 2   | 169 | TETMLSWPPMEVELNEKLAPWYSTVASSTHFRSYQNK                 |
| Jtype2a               | TG <i>cyrJ</i> 1   | 185 | TETMLSWPPMEVELNEKLAPWYSTVASSTRFRSYQNK                 |
| Jtype2b               | SY <i>cyrJ</i> 1   | 183 | TETMLSWPPMEVELNEKLAPWYSTVASSTHFRSYQNK                 |
| Jtype3                | TG <i>cyrJ</i> 7   | 201 | TETMLSWPPMEVELNEKLAPWYSTVASSTHFRSYQNK                 |
| <i>C. raciborskii</i> | AWT205 <i>cyrJ</i> | 183 | TETMLSWPPMEVELNEKLAPWYSTVASSTHFHSYQNK                 |

Figure S7 Predicted secondary structures of CyrJ proteins. Bold line,  $\alpha$ -helix and  $\beta$ -sheet; dash line, gaps introduced into the alignment.

*C. raciborskii* CHAB3438 (CYNs-producing)

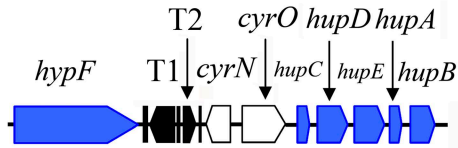

*C. raciborskii* CHAB357 (CYNs-producing)

*cyrN cyrO hupC*

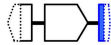

*R. curvata* HB1 (CYNs-producing)

*cyrN cyrO hupC*

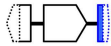

*C. raciborskii* CHAB151 (Non-CYNs-producing)

*hypF cyrO hupC*

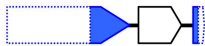

Figure S8 *hyp* genes and intergenic sequences in CYNs-producing and non-CYNs-producing cyanobacterial strains. Blue bar, *hyp* genes; white bar, *cyrN* and *cyrO* genes; black bar, transposase or vestiges thereof; dash line, gene regions which were not sequenced.

Table S1 Details of cyanobacterial strains used in this study.

| <b>Cyanobacteria</b>             | <b>Geographic origin</b>               | <b>Year of isolation</b> |
|----------------------------------|----------------------------------------|--------------------------|
| <b><i>Microcystis</i></b>        |                                        |                          |
| <i>Microcystis</i> sp.           |                                        |                          |
| CHAB3377                         | Nuoshan reservoir, Qingdao, Shandong   | 2007                     |
| CHAB3393                         | Fish pond, Nanjing, Jiangsu            | 2007                     |
| CHAB4373                         | Three gorges reservoir, Yichang, Hubei | 2008                     |
| CHAB4368                         | Erhai lake, Dali, Yunnan               | 2007                     |
| <i>M. aeruginosa</i>             |                                        |                          |
| CHAB3390                         | Chaohu lake, Anhui                     | 2007                     |
| CHAB453                          | Fish pond, Wuhan, Hubei                | 2006                     |
| <i>M. flos-aquae</i>             |                                        |                          |
| Two strains                      | Guazhu lake, Shaoxing, Zhejiang        | 2006                     |
| <i>M. botrys</i>                 |                                        |                          |
| CHAB331                          | Xihu lake, Hangzhou, Zhejiang          | 2006                     |
| CHAB342                          | Hang-Yong canal, Shaoxing, Zhejiang    | 2006                     |
| CHAB3382                         | Erhai lake, Dali, Yunnan               | 2007                     |
| <i>M. viridis</i>                |                                        |                          |
| CHAB3379                         | Xingyun lake, Yuxi, Yunnan             | 2007                     |
| <i>M. smithii</i>                |                                        |                          |
| CHAB3301                         | Fish pond, Kunming, Yunnan             | 2006                     |
| <i>M. wesenbergii</i>            |                                        |                          |
| CHAB328                          | Guanqiao pond, Wuhan, Hubei            | 2006                     |
| CHAB1418                         | Dianchi lake, Kunming, Yunnan          | 2006                     |
| CHAB4372                         | Erhai lake, Dali, Yunnan               | 2007                     |
| <b><i>Cylindrospermopsis</i></b> |                                        |                          |
| <i>C. raciborskii</i>            |                                        |                          |
| Twelve strains                   | Fish pond, Kunming, Yunnan             | 2006                     |
| Eight strains                    | Wenshan lake, Shenzhen, Guangdong      | 2006                     |
| Two strains                      | Shiyan reservoir, Shenzhen, Guangdong  | 2006                     |
| Four strains                     | Fish pond, Panyu, Guangdong            | 2012                     |
| Nine strains                     | Nanhu lake, Wuhan, Hubei               | 2006                     |
| Eight strains                    | Donghu lake, Wuhan, Hubei              | 2012                     |
| Six strains                      | Chidong lake, Qichun, Hubei            | 2006                     |
| Twenty strains                   | Liangzi lake, Ezhou, Hubei             | 2006, 2011               |
| CHAB3412                         | Qiaodun lake, Daye, Hubei              | 2011                     |
| Three strains                    | Lushui reservoir, Chibi, Hubei         | 2012                     |
| Eight strains                    | Xianghu lake, Hangzhou, Zhejiang       | 2012                     |
| CHAB3447                         | Xihu lake, Hangzhou, Zhejiang          | 2012                     |
| Seventeen strains                | Qiandao lake, Hangzhou, Zhejiang       | 2012                     |

|                            |                                        |            |
|----------------------------|----------------------------------------|------------|
| Two strains                | Dongqian lake, Ningbo, Zhejiang        | 2012       |
| <b><i>Raphidiopsis</i></b> |                                        |            |
| <i>R. curvata</i>          |                                        |            |
| CHAB341                    | Fusha reservoir, Zhongshan, Guangdong  | 2006       |
| CHAB3360                   | Donghu lake, Wuhan, Hubei              | 2006       |
| HB1                        | Guanqiao pond, Wuhan, Hubei            | 1995       |
| Two strains                | Chidong lake, Qichun, Hubei            | 2006       |
| Four strains               | Qiaodun lake, Daye, Hubei              | 2011       |
| Three strains              | Jinyang lake, Taiyuan, Shanxi          | 2010       |
| CHAB3411                   | Xianghu lake, Hangzhou, Zhejiang       | 2011       |
| Four strains               | Xihu lake, Hangzhou, Zhejiang          | 2012       |
| Two strains                | Qiandao lake, Hangzhou, Zhejiang       | 2012       |
| <i>R. mediterranea</i>     |                                        |            |
| Three strains              | Donghu lake, Wuhan, Hubei              | 2006, 2012 |
| HB2                        | Guanqiao pond, Wuhan, Hubei            | 2006       |
| Two strains                | Chidong lake, Qichun, Hubei            | 2006       |
| CHAB3326                   | Liangzi lake, Ezhou, Hubei             | 2006       |
| CHAB3422                   | Lushui reservoir, Chibi, Hubei         | 2012       |
| CHAB3468                   | Qiandao lake, Hangzhou, Zhejiang       | 2012       |
| <b><i>Anabaena</i></b>     |                                        |            |
| <i>Anabaena</i> sp.        |                                        |            |
| Two strains                | Dianchi lake, Kunming, Yunnan          | 2007       |
| CHAB4327                   | Fish pond, Kunming, Yunnan             | 2006       |
| Two strains                | Donghu lake, Wuhan, Hubei              | 2006       |
| CHAB336                    | Guanqiao pond, Wuhan, Hubei            | 2006       |
| CHAB4325                   | Xinghu lake, Wuhan, Hubei              | 2006       |
| CHAB4304                   | Fish pond, Nanjing, Jiangsu            | 2007       |
| CHAB4307                   | Guazhu lake, Shaoxing, Zhejiang        | 2007       |
| Four strains               | Poyang lake, Jiangxi                   | 2012       |
| <i>A. eucompacta</i>       |                                        |            |
| Four strains               | Nanhu lake, Wuhan, Hubei               | 2006       |
| Two strains                | Guanqiao pond, Wuhan, Hubei            | 2006       |
| CHAB1040                   | Chidong lake, Qichun, Hubei            | 2006       |
| <i>A. spirioides</i>       |                                        |            |
| CHAB511                    | Guanqiao pond, Wuhan, Hubei            | 2006       |
| CHAB5152                   | Poyang lake, Jiangxi                   | 2012       |
| <i>A. ucrainica</i>        |                                        |            |
| Seven strains              | Dianchi lake, Kunming, Yunnan          | 2006, 2007 |
| Nine strains               | Erhai lake, Dali, Yunnan               | 2006       |
| <i>A. flos-aquae</i>       |                                        |            |
| Three strains              | Three gorges reservoir, Yichang, Hubei | 2008       |
| HAB634                     | Chidong lake, Qichun, Hubei            | 2006       |

|                             |                                        |            |
|-----------------------------|----------------------------------------|------------|
| Two strains                 | Nanhu lake, Wuhan, Hubei               | 2006       |
| Three strains               | Taihu lake, Wuxi, Jiangsu              | 2009       |
| Two strains                 | Poyang lake, Jiangxi                   | 2012       |
| <i>A. oumiana</i>           |                                        |            |
| Three strains               | Guangqiao pond, Wuhan, Hubei           | 2006       |
| CHAB5110                    | Poyang lake, Jiangxi                   | 2012       |
| <i>A. aphanizomenioides</i> |                                        |            |
| Two strains                 | Wenshan lake, Shenzhen, Guangdong      | 2006       |
| Two strains                 | Chidong lake, Qichun, Hubei            | 2006       |
| CHAB2313                    | Honghu lake, Honghu, Hubei             | 2006       |
| Two strains                 | Yuyuantan park, Beijing                | 2006       |
| <i>A. affinis</i>           |                                        |            |
| Two strains                 | Dianchi lake, Kunming, Yunnan          | 2007       |
| Two strains                 | Three gorges reservoir, Yichang, Hubei | 2008       |
| CHAB960                     | Chidong lake, Qichun, Hubei            | 2006       |
| Three strains               | Poyang lake, Jiangxi                   | 2012       |
| <i>A. kisseleviana</i>      |                                        |            |
| CHAB2398                    | Wenshan lake, Shenzhen, Guangdong      | 2006       |
| Four strains                | Longhu lake, Daqing, Heilongjiang      | 2012       |
| <i>A. crassum</i>           |                                        |            |
| Three strains               | Poyang lake, Jiangxi                   | 2012       |
| <i>A. planktonic</i>        |                                        |            |
| Two strains                 | Poyang lake, Jiangxi                   | 2012       |
| <i>A. circinalis</i>        |                                        |            |
| CHAB5160                    | Poyang lake, Jiangxi                   | 2012       |
| <b><i>Aphanizomenon</i></b> |                                        |            |
| <i>Aph. issatschenkoi</i>   |                                        |            |
| CHAB628                     | Dianchi lake, Kunming, Yunnan          | 2007       |
| Seven strains               | Chidong lake, Qichun, Hubei            | 2006       |
| Two strains                 | Honghu lake, Honghu, Hubei             | 2006       |
| Four strains                | Donghu lake, Wuhan, Hubei              | 2006       |
| CHAB D3                     | Xinghu lake, Wuhan, Hubei              | 2007       |
| <i>Aph. flos-aquae</i>      |                                        |            |
| Three strains               | Dianchi lake, Kunming, Yunnan          | 2006, 2007 |
| Three strains               | Erhai lake, Dali, Yunnan               | 2006       |
| Four strains                | Three gorges reservoir, Yichang, Hubei | 2008       |
| <i>Aph. gracile</i>         |                                        |            |
| FACHB-1039                  | Dianchi lake, Kunming, Yunnan          | 2004       |
| CHAB1468                    | Yuehu lake, Wuhan, Hubei               | 2007       |
| <b><i>Planktothrix</i></b>  |                                        |            |
| <i>P. agardhii</i>          |                                        |            |
| Three strains               | Dianchi lake, Kunming, Yunnan          | 2007       |

|                             |                                               |            |
|-----------------------------|-----------------------------------------------|------------|
| Three strains               | Fish pond, Kunming, Yunnan                    | 2006       |
| CHAB683                     | Erhai lake, Dali, Yunnan                      | 2007       |
| Two strains                 | Fusha reservoir, Zhongshan, Guangdong         | 2006       |
| Three strains               | Nanhu lake, Wuhan, Hubei                      | 2006       |
| Two strains                 | Chidong lake, Qichun, Hubei                   | 2006       |
| CHAB643                     | Guanqiao pond, Wuhan, Hubei                   | 2007       |
| CHAB679                     | Yuehu lake, Wuhan, Hubei                      | 2007       |
| Three strains               | Majianggong river, Jinxian, Jiangxi           | 2006       |
| CHAB662                     | Taihu lake, Wuxi, Jiangsu                     | 2007       |
| Three strains               | Hang-Yong canal, Shaoxing, Zhejiang           | 2006       |
| Two strains                 | Fuchunjiang waterworks, Hangzhou,<br>Zhejiang | 2006       |
| CHAB619                     | Dishui lake, Shanghai                         | 2006       |
| Six strains                 | Yuyuantan park, Beijing                       | 2006, 2007 |
| Three strains               | Ulungur lake, Fuhai, Xinjiang                 | 2007       |
| <i>P. raciborskii</i>       |                                               |            |
| CHAB626                     | Fish pond, Kunming, Yunnan                    | 2006       |
| <i>P. mougeotii</i>         |                                               |            |
| Two strains                 | Erhai lake, Dali, Yunnan                      | 2008       |
| Three strains               | Manmade wetland, Guangzhou,<br>Guangdong      | 2007       |
| <i>P. spiroides</i>         |                                               |            |
| CHAB4340                    | Guazhu lake, Shaoxing, Zhejiang               | 2007       |
| <i>Planktothrix</i> sp.     |                                               |            |
| Two strains                 | Erhai lake, Dali, Yunnan                      | 2008       |
| Four strains                | Poyang lake, Jiangxi                          | 2012       |
| Four strains                | Longhu lake, Daqing, Heilongjiang             | 2012       |
| <b><i>Lyngbya</i></b>       |                                               |            |
| <i>Lyngbya</i> sp.          |                                               |            |
| Three strains               | Fish pond, Kunming, Yunnan                    | 2007       |
| Six strains                 | Erhai lake, Dali, Yunnan                      | 2007       |
| Two strains                 | Tianmu hotspring, Lushan, Jiangxi             | 2007       |
| Six strains                 | Poyang lake, Jiangxi                          | 2012       |
| Three strains               | Sward, Nanjing, Jiangsu                       | 2009       |
| <b><i>Oscillatoria</i></b>  |                                               |            |
| <i>Oscillatoria</i> sp.     |                                               |            |
| Two strains                 | Shiyan reservoir, Shenzhen, Guangdong         | 2007       |
| Two strains                 | Fuchunjiang waterworks, Hangzhou,<br>Zhejiang | 2006       |
| <b><i>Pseudanabaena</i></b> |                                               |            |
| <i>Pseudanabaena</i> sp.    |                                               |            |
| CHAB2916                    | Erhai lake, Dali, Yunnan                      | 2008       |



|                                 |                                   |      |
|---------------------------------|-----------------------------------|------|
| CHAB685                         | Donghu lake, Guangzhou, Guangdong | 2008 |
| Ten strains                     | Donghu lake, Wuhan, Hubei         | 2009 |
| Twelve strains                  | Xinghu lake, Wuhan, Hubei         | 2009 |
| Two strains                     | Guanqiao pond, Wuhan, Hubei       | 2006 |
| CHAB2969                        | Taihu lake, Wuxi, Jiangsu         | 2008 |
| CHAB3113                        | Jinyang lake, Taiyuan, Shanxi     | 2009 |
| CHAB1496                        | Ulungur lake, Fuhai, Xinjiang     | 2007 |
| <b><i>Limnothrix</i></b>        |                                   |      |
| <i>Limnothrix</i> sp.           |                                   |      |
| Five strains                    | Donghu lake, Wuhan, Hubei         | 2009 |
| Three strains                   | Poyang lake, Jiangxi              | 2012 |
| <b>Other strains</b>            |                                   |      |
| <i>C. raciborskii</i> AWT205    | Australia                         | —    |
| <i>C. raciborskii</i> cyDB-1    | Brazil                            | 2003 |
| <i>Aph. ovalisporum</i> ILC-164 | Israel                            | —    |

Table S2 Localization of water bodies investigated in this study.

| <b>Water bodies</b>                | <b>Latitude and Longitude</b>    |
|------------------------------------|----------------------------------|
| Longhu lake, Daqing, Heilongjiang  | 46°42'N, 124°22'E                |
| Jinyang lake, Taiyuan, Shanxi      | 37°46'N, 112°30'E                |
| Fish pond, Qingdao, Shandong       | 37°46'N, 112°30'E                |
| Taihu lake, Wuxi, Jiangsu          | 30°55'–31°33'N, 119°53'–120°36'E |
| Fish pond, Nanjing, Jiangsu        | 32°01'N, 118°49'E                |
| Qiandao lake, Hangzhou, Zhejiang   | 29°26'–29°42'N, 118°43'–119°11'E |
| Xianghu lake, Hangzhou, Zhejiang   | 30°09'N, 120°13'E                |
| Xihu lake, Hangzhou, Zhejiang      | 30°14'N, 120°08'E                |
| Dongqian lake, Ningbo, Zhejiang    | 29°45'N, 121°39'E                |
| Donghu lake, Wuhan, Hubei          | 30°33'N, 114°23'E                |
| Tangxun lake, Wuhan, Hubei         | 30°25'N, 114°20'E                |
| Guanqiao Pond, Wuhan, Hubei        | 30°31'N, 114°23'E                |
| Liangzi lake, Ezhou, Hubei         | 30°15'N, 114°30'E                |
| Qiaodun lake, Daye, Hubei          | 30°06'N, 114°56'E                |
| Chidong lake, Qichun, Hubei        | 29°47'N, 115°41'E                |
| Lushui reservoir, Chibi, Hubei     | 29°41'N, 113°55'E                |
| Poyang lake, Nanchang, Jiangxi     | 28°22'–29°45'N, 115°47'–116°45'E |
| Erhai lake, Dali, Yunnan           | 25°35'–25°58'N, 100°5'–100°17'E  |
| Fish pond, Kunming, Yunnan         | 24°56'N, 102°42'E                |
| Dongzhen reservoir, Putian, Fujian | 25°28'N, 118°56'E                |
| Fish pond, Panyu, Guangdong        | 22°56'N, 113°18'E                |
| Shiyan reservoir, Shenzhen         | 22°41'N, 113°54'E                |
| Qiankeng reservoir, Shenzhen       | 22°41'N, 114°0'E                 |
| Tiegang reservoir, Shenzhen        | 22°37'N, 113°52'E                |
| Luotian reservoir, Shenzhen        | 22°51'N, 113°52'E                |
| Changliupi reservoir, Shenzhen     | 22°43'N, 113°51'E                |
| Wenshan lake, Shenzhen             | 22°32'N, 113°55'E                |

Table S3 GenBank accession numbers of reference gene sequences used in the phylogenetic analysis.

| Organism                        | Gene region  |              |              |              |
|---------------------------------|--------------|--------------|--------------|--------------|
|                                 | <i>rpoC1</i> | <i>cyrA</i>  | <i>cyrI</i>  | <i>cyrJ</i>  |
| <i>C. raciborskii</i> AWT205    | KJ139708     | EU140798     | EU140798     | EU140798     |
| <i>C. raciborskii</i> CS-505    | ACYA01000039 | ACYA01000027 | ACYA01000027 | ACYA01000027 |
| <i>C. raciborskii</i> cyDB-1    | KJ139709     | KJ139707     | KJ139696     | KJ139693     |
| <i>C. raciborskii</i> CHAB151   | KJ139719     | —            | —            | —            |
| <i>C. raciborskii</i> CHAB358   | KJ139714     | KJ139742     | KJ139742     | KJ139742     |
| <i>C. raciborskii</i> CHAB1351  | KJ139720     | —            | —            | —            |
| <i>C. raciborskii</i> CHAB3409  | KJ139725     | —            | —            | —            |
| <i>C. raciborskii</i> CHAB3412  | KJ139726     | —            | —            | —            |
| <i>C. raciborskii</i> CHAB3424  | KJ139727     | —            | —            | —            |
| <i>C. raciborskii</i> CHAB3438  | KJ139716     | KJ139743     | KJ139743     | KJ139743     |
| <i>C. raciborskii</i> CHAB5182  | KJ139729     | —            | —            | —            |
| <i>R. mediterranea</i> CHAB1355 | KJ139721     | —            | —            | —            |
| <i>R. mediterranea</i> CHAB3326 | KJ139722     | —            | —            | —            |
| <i>R. mediterranea</i> CHAB3428 | KJ139730     | —            | —            | —            |
| <i>R. mediterranea</i> CHAB3433 | KJ139715     | —            | —            | —            |
| <i>R. mediterranea</i> CHAB3468 | KJ139731     | —            | —            | —            |
| <i>R. mediterranea</i> HB2      | KJ139724     | —            | —            | —            |
| <i>R. mediterranea</i> FSS-150  | —            | —            | —            | KC342468     |
| <i>R. curvata</i> CHAB341       | KJ139712     | —            | —            | —            |
| <i>R. curvata</i> CHAB1150      | KJ139711     | JN873921     | JN873921     | JN873921     |
| <i>R. curvata</i> CHAB3405      | KJ139732     | —            | —            | —            |
| <i>R. curvata</i> CHAB3413      | KJ139735     | —            | —            | —            |
| <i>R. curvata</i> CHAB3416      | KJ139723     | KJ139706     | KJ139687     | KJ139692     |
| <i>R. curvata</i> CHAB3448      | KJ139737     | —            | —            | —            |
| <i>R. curvata</i> HB1           | KJ139718     | KJ139745     | KJ139745     | KJ139745     |
| <i>R. brookii</i> D9            | ACYB01000007 | —            | —            | —            |
| <i>Aphanizomenon</i> sp. 10E6   | —            | GQ385961     | GQ385961     | GQ385961     |
| <i>Aphanizomenon</i> sp. 22D11  | —            | GQ385960     | —            | —            |
| <i>Aph. ovalisporum</i> ILC-164 | —            | AF395828     | KJ139697     | KJ139694     |
| <i>Aph. gracile</i> ANA196-A    | JQ811806.1   | —            | —            | —            |
| <i>A. lapponica</i> 966         | —            | —            | —            | KC342460     |
| <i>A. variabilis</i> ATCC29413  | CP000117     | —            | —            | —            |
| <i>U. natans</i> TAC101         | —            | AY897605     | —            | —            |
| <i>L. wollei</i> Yabba Creek    | —            | —            | —            | KC342466     |
| <i>Oscillatoria</i> sp. PCC6506 | —            | FJ418586     | FJ418586     | FJ418586     |
| <i>Oscillatoria</i> sp. PCC7926 | —            | —            | HQ690088     | —            |

Table S4 Extracellular and intracellular CYNs in the cultures of four CYNs-producing cyanobacterial strains at the 3rd day and the 7th day.

| Strain <sup>a</sup> |                   | AWT205                                    | CHAB358                       | CHAB3438                      | CHAB1150                      |
|---------------------|-------------------|-------------------------------------------|-------------------------------|-------------------------------|-------------------------------|
| <b>0 day</b>        | OD <sub>680</sub> | 0.13                                      | 0.13                          | 0.13                          | 0.13                          |
| <b>3rd day</b>      | OD <sub>680</sub> | 0.29 ± 0.01 <sup>b</sup>                  | 0.24 ± 0.00                   | 0.34 ± 0.00                   | 0.34 ± 0.01                   |
|                     | CYN (µg)          | 1.58 ± 0.36 <sup>c</sup><br>(4.23 ± 0.43) | –                             | 2.84 ± 0.22<br>(9.12 ± 1.18)  | –                             |
|                     | 7-deoxy-CYN (µg)  | 0.06 ± 0.01<br>(0.20 ± 0.00)              | 2.19 ± 0.07<br>(8.03 ± 0.08)  | 0.23 ± 0.02<br>(0.27 ± 0.05)  | 2.31 ± 0.16<br>(13.04 ± 0.42) |
| <b>7th day</b>      | OD <sub>680</sub> | 0.56 ± 0.02                               | 0.34 ± 0.00                   | 0.61 ± 0.02                   | 0.58 ± 0.01                   |
|                     | CYN (µg)          | 6.71 ± 0.22<br>(10.32 ± 0.82)             | –                             | 8.78 ± 1.89<br>(20.42 ± 3.52) | –                             |
|                     | 7-deoxy-CYN (µg)  | 0.31 ± 0.02<br>(0.39 ± 0.03)              | 5.50 ± 0.33<br>(17.14 ± 0.36) | 0.56 ± 0.12<br>(0.54 ± 0.17)  | 9.78 ± 1.32<br>(28.32 ± 1.91) |

<sup>a</sup>, The strain numbers were described in the main text.

<sup>b</sup>, Mean ± SD.

<sup>c</sup>, Extracellular and intracellular (in parentheses) toxins in 100 ml culture.
